# Supplementary material for: Assessing Chinese anatomists’ perceptions and attitudes toward blended learning through faculty development training programs
Source: PeerJ. 2023 Oct 30;11:e16283. doi: 10.7717/peerj.16283 (PMC10621592; doi:10.7717/peerj.16283)
Supplement: Data S1 [file peerj-11-16283-s001.xlsx]

## Sheet: 2. survey response
	I. The respondents'demographic information												II. The experience as an anatomy educator																			III. The professional training received as a teacher and a researcher
Submission time	Time used of answering the survey	Gender	Age	Which kind of university/college do you work at?	What job title do you have at your university/college?	How long have you worked at your current university/college?	What academic degrees have you been rewarded? (PhD)	What academic degrees have you been rewarded? (MD)	What academic degrees have you been rewarded? (Master degree)	What academic degrees have you been rewarded? (Bachelor degree)	What academic degrees have you been rewarded? (Other, explain please)	When did you start your anatomy teaching?	Please choose the discipline and students’ major you teach. (Clinical anatomy)	Please choose the discipline and students’ major you teach. (Neuroanatomy)	Please choose the discipline and students’ major you teach. (Histology)	Please choose the discipline and students’ major you teach. (Cell biology)	Please choose the discipline and students’ major you teach. (Forensic medicine)	Please choose the discipline and students’ major you teach. (Comparative anatomy)	Please choose the discipline and students’ major you teach. (Veterinary anatomy)	Please choose the discipline and students’ major you teach. (Embryology/Developmental anatomy)	Please choose the discipline and students’ major you teach. (Others, explain please)	What is/are your research fields? (Morphological anatomy)	What is/are your research fields? (Histology and cell biology)	What is/are your research fields? (Embryology and developmental anatomy)	What is/are your research fields? (Clinical and functional anatomy)	What is/are your research fields? (Dental anatomy)	What is/are your research fields? (Radiology)	What is/are your research fields? (Anthropobiology)	What is/are your research fields? (Anthropology)	What is/are your research fields? (Medical/anatomical education)	What is/are your research fields? (Others, explain please)	What kind of professional training related to education have you had since you worked as a teacher at university/college?	Have your division/department arranged a mentor for you since you worked as a teacher?	Do you think that you have been fully supported from your university/college since you became a university staff? (1: not at all; 6: fully supported)	Which activity below is mostly contributed to support your career development? (1: completely useless; 6: very useful) Attending academic conference	Which activity below is mostly contributed to support your career development? (1: completely useless; 6: very useful) Guidance from adviser	Which activity below is mostly contributed to support your career development? (1: completely useless; 6: very useful) Learning from colleagues	Which activity below is mostly contributed to support your career development? (1: completely useless; 6: very useful) Discussing with colleagues	Which activity below is mostly contributed to support your career development? (1: completely useless; 6: very useful) Workshop/training courses etc.	Which activity below is mostly contributed to support your career development? (1: completely useless; 6: very useful) Visiting scholar	How much do you think that the following choices could contribute to your career development? (International collaboration with foreign anatomists on education)	How much do you think that the following choices could contribute to your career development? (International collaboration with foreign anatomists on scientific research)	How much do you think that the following choices could contribute to your career development? (Training of anatomical knowledge)	How much do you think that the following choices could contribute to your career development? (Obtaining anatomical knowledge via VR or online learning)	How much do you think that the following choices could contribute to your career development? (Training the skill to use scientific resources,equipment and information etc. )	How much do you think that the following choices could contribute to your career development? (Gaining the support to attend scientific conference)	How much do you think that the following choices could contribute to your career development? (Training how to organize conference or workshop)	How much do you think that the following choices could contribute to your career development? (Training how to write scientific manuscript)	How much do you think that the following choices could contribute to your career development? (Training how to apply for research grant)
2021-10-09 10:51:13	450	1	47	1	5	27	0	0	1	0	0	1	4	1	3	4	4	4	3	4	1	0	0	0	0	0	0	0	0	1	1	1	1	5	5	6	5	6	4	5	3	5	4	3	4	3	4	5	4
2021-10-09 10:52:31	492	1	52	1	5	30	1	0	0	0	0	1	2	1	5	5	1	5	4	4	2	1	0	0	1	0	0	0	0	1	0	1	1	5	5	6	5	5	5	6	6	6	6	6	6	6	6	6	6
2021-10-09 11:07:11	590	1	57	1	5	35	0	0	1	0	0	1	1	1	1	1	1	1	4	4	4	0	1	0	0	0	0	0	0	0	0	2	1	4	6	6	6	6	6	6	6	6	6	6	6	6	6	6	6
2021-10-09 11:10:29	624	1	54	1	5	27	0	0	1	0	0	1	1	1	5	5	5	5	5	1	4	0	0	1	0	0	0	0	0	0	1	1	2	4	4	6	4	5	6	5	5	5	6	5	6	4	5	5	5
2021-10-09 11:11:57	251	2	33	1	3	7	0	0	1	0	0	3	1	4	4	4	4	4	4	4	4	1	0	0	1	0	0	0	0	1	0	1	1	4	5	5	5	5	3	1	4	4	4	4	4	4	4	4	4
2021-10-09 11:14:20	1260	1	58	1	5	16	1	0	0	0	0	1	5	1	1	1	5	5	5	1	5	0	1	1	0	0	0	0	0	0	0	1	1	6	5	5	5	5	4	5	4	4	6	5	5	4	4	5	5
2021-10-09 11:15:16	632	1	42	1	4	13	0	0	1	0	0	2	1	2	4	4	4	4	4	4	4	1	0	0	0	0	0	0	0	0	0	1	2	3	3	6	4	5	4	5	5	5	5	3	4	4	5	3	3
2021-10-09 11:15:33	688	1	52	1	4	16	0	1	0	0	0	2	1	1	1	1	1	1	1	1	1	1	0	0	0	0	0	0	0	1	0	1	2	1	4	1	2	3	1	1	6	6	6	4	3	4	4	3	1
2021-10-09 11:18:47	225	2	42	1	5	15	1	0	0	0	0	2	4	4	1	4	4	4	4	1	4	0	1	1	0	0	0	0	0	0	0	1	1	5	6	6	6	6	6	6	3	3	3	6	6	6	6	6	6
2021-10-09 11:21:56	349	1	42	1	4	14	1	0	0	0	0	2	1	1	2	3	3	3	3	3	3	1	0	0	0	0	0	0	0	1	0	1	1	6	6	6	6	6	6	6	6	6	6	6	6	6	6	6	6
2021-10-09 11:22:20	420	2	45	1	4	21	1	1	0	0	0	1	1	1	1	1	1	1	1	1	1	1	0	0	1	0	1	0	0	1	0	2	1	5	6	6	6	6	6	6	6	6	6	6	6	6	6	6	6
2021-10-09 11:22:32	760	1	57	1	5	32	0	0	0	1	0	1	1	4	1	4	4	4	4	4	4	1	0	0	1	0	0	0	0	1	0	1	1	4	5	5	3	5	3	5	5	5	5	5	4	4	4	4	5
2021-10-09 11:23:50	584	2	41	1	4	9	0	0	1	0	0	3	1	1	1	1	1	1	1	1	1	1	0	0	1	0	0	0	0	0	0	1	1	6	3	3	3	3	3	3	3	4	5	4	4	1	2	3	4
2021-10-09 11:24:31	968	1	58	1	4	26	0	0	0	1	0	1	1	3	4	4	4	4	4	4	4	1	0	0	0	0	1	0	0	1	0	1	1	4	2	6	2	3	6	6	4	4	6	2	6	3	1	6	4
2021-10-09 11:25:13	490	2	52	1	5	29	0	0	1	0	0	1	1	1	1	1	1	1	1	1	3	1	1	0	1	0	0	0	0	1	0	1	1	5	6	6	6	6	6	6	6	6	6	6	6	6	6	6	6
2021-10-09 11:27:00	603	1	25	1	6	0.8	0	0	0	1	0	4	4	4	4	4	1	4	4	4	4	0	0	0	0	0	0	0	0	1	0	2	1	2	4	6	4	4	4	4	4	3	4	4	3	3	4	3	3
2021-10-09 11:28:09	489	1	40	1	5	6	1	0	0	0	0	1	1	1	2	4	4	4	4	4	4	1	1	0	0	0	0	0	0	0	0	1	1	5	5	5	6	6	4	2	5	5	6	2	4	6	5	4	4
2021-10-09 11:29:57	845	2	38	1	3	9	0	0	1	0	0	3	1	1	1	1	1	1	1	1	1	1	0	0	0	0	0	0	0	0	0	1	1	5	4	4	5	4	4	3	5	4	6	4	4	3	4	4	5
2021-10-09 11:30:18	464	1	54	1	3	33	0	0	0	1	0	1	2	2	1	3	2	2	2	3	2	1	0	0	0	0	0	0	0	1	0	2	1	5	4	4	4	4	4	4	3	4	4	4	3	4	4	4	3
2021-10-09 11:30:42	1104	1	40	1	4	17	1	0	0	0	0	1	1	1	1	1	1	1	4	1	1	1	0	0	0	0	0	0	0	0	0	1	1	6	6	6	6	6	6	6	5	6	5	6	5	5	5	5	5
2021-10-09 11:30:55	178	1	35	1	3	7	0	0	1	0	0	3	1	1	1	1	1	1	1	1	1	0	0	0	1	0	0	0	0	0	0	1	1	6	6	6	6	6	6	6	6	6	6	6	6	6	6	6	6
2021-10-09 11:31:11	850	2	52	1	5	12	0	1	0	0	0	2	1	1	1	1	1	1	1	1	1	1	1	0	0	0	0	0	0	0	0	2	1	3	6	6	6	4	4	4	2	4	3	3	3	3	4	4	4
2021-10-09 11:31:51	907	1	53	1	5	15	0	0	1	0	0	1	1	1	1	4	4	4	4	4	4	1	0	0	1	0	0	0	0	0	0	1	1	6	5	6	5	5	3	5	1	1	6	5	3	3	3	3	3
2021-10-09 11:33:32	298	1	49	1	5	22	1	0	0	0	0	1	3	3	3	3	3	3	3	3	3	1	0	0	0	0	0	0	0	0	0	1	1	4	5	5	5	5	4	4	3	2	4	4	4	4	4	4	4
2021-10-09 11:36:24	718	1	47	1	5	2	1	0	0	0	0	3	5	5	5	5	5	5	5	5	5	0	0	0	0	0	0	0	0	0	1	2	2	2	5	5	6	3	4	5	6	5	5	5	5	4	4	4	5
2021-10-09 11:42:30	426	2	31	1	3	3	0	0	1	0	0	4	1	4	1	4	4	1	4	1	1	0	1	0	0	0	0	0	0	1	0	1	2	2	5	6	6	5	4	6	6	6	6	6	5	4	3	6	6
2021-10-09 11:43:18	259	2	38	1	3	12	0	0	0	1	0	2	1	1	1	1	1	1	4	4	4	1	0	0	0	0	0	0	0	0	0	1	1	5	6	6	6	6	6	6	5	5	6	6	6	6	6	6	5
2021-10-09 11:43:58	724	1	51	1	5	26	0	1	0	0	0	1	1	4	4	4	4	4	4	4	4	1	0	0	0	0	0	0	0	0	0	1	1	6	3	6	6	5	5	4	3	4	3	3	3	2	2	2	2
2021-10-09 11:44:31	496	1	49	1	4	23	0	0	1	0	0	1	1	1	1	1	1	1	1	1	1	0	0	0	1	0	0	0	0	1	0	1	1	6	6	5	5	6	6	6	6	5	6	4	6	4	6	4	6
2021-10-09 11:44:32	1661	1	46	1	4	4	1	0	0	0	0	4	1	1	4	4	4	4	4	4	4	1	0	1	1	0	0	0	0	0	0	1	2	5	6	6	5	5	6	5	6	6	6	4	5	5	5	5	5
2021-10-09 11:46:35	892	1	34	1	3	5	0	0	1	0	0	4	5	3	1	1	1	1	4	1	4	0	0	0	0	0	0	0	0	1	0	1	1	6	5	6	6	6	6	5	6	6	6	6	5	6	5	6	6
2021-10-09 11:53:41	2524	2	42	1	4	19	1	0	0	0	0	1	1	1	4	4	1	1	1	1	1	1	0	0	0	0	0	0	0	1	0	1	1	5	4	5	5	4	4	5	5	5	5	4	5	5	3	4	5
2021-10-09 11:55:58	745	1	56	1	5	32	0	0	1	0	0	1	4	4	2	4	4	4	4	4	4	1	0	0	0	0	0	0	0	1	0	1	1	4	5	5	4	5	5	5	4	4	6	4	4	4	3	4	4
2021-10-09 11:56:36	461	1	39	1	4	3	1	0	0	0	0	4	1	1	1	1	1	4	4	4	4	1	0	0	0	0	0	0	0	0	0	3	2	2	6	6	3	1	6	6	5	4	6	5	3	4	3	4	5
2021-10-09 12:02:16	667	1	55	1	5	25	0	1	0	0	0	1	1	4	4	4	4	4	4	4	4	1	0	0	0	0	0	0	0	1	0	1	1	3	4	4	3	2	4	5	4	4	4	5	3	3	4	4	5
2021-10-09 12:03:51	889	1	56	1	5	34	1	0	0	0	0	1	1	5	5	5	5	5	5	5	5	1	0	0	0	0	0	0	0	0	0	1	2	4	5	5	6	6	5	5	5	5	5	5	5	5	4	5	5
2021-10-09 12:06:21	364	1	50	1	5	26	0	1	0	0	0	3	1	1	3	3	4	2	3	4	3	1	0	0	1	0	0	0	0	1	0	1	1	3	5	5	5	4	5	5	6	6	6	4	5	5	5	6	5
2021-10-09 12:06:57	521	2	54	1	5	34	0	0	1	0	0	1	2	3	3	4	4	4	4	4	4	1	1	0	0	0	0	0	0	1	0	1	1	5	6	6	6	6	6	6	6	6	6	6	6	6	6	6	6
2021-10-09 12:11:17	404	2	46	1	5	22	1	1	0	0	0	1	1	1	1	1	1	1	1	1	1	0	0	0	0	0	0	0	1	1	0	1	1	5	6	6	6	6	6	6	6	6	6	5	6	6	6	6	6
2021-10-09 12:13:03	716	1	48	1	5	20	0	1	0	0	0	1	4	1	1	1	1	1	1	1	1	1	0	0	0	0	0	0	0	0	0	2	1	5	1	6	5	2	2	2	3	2	5	4	2	2	4	3	2
2021-10-09 12:15:35	893	2	56	1	5	10	1	0	0	0	0	1	1	1	1	1	4	4	4	1	1	1	0	0	1	0	0	0	0	1	0	2	2	2	5	4	4	4	2	6	2	4	4	5	3	4	2	4	4
2021-10-09 12:23:36	512	1	45	1	4	12	0	0	1	0	0	2	3	3	3	3	3	3	3	3	5	0	0	0	0	0	0	0	0	0	1	1	2	2	5	4	2	3	4	6	6	4	3	4	4	5	4	5	5
2021-10-09 12:23:47	1760	2	42	1	4	13	1	0	0	0	0	2	1	1	1	3	1	4	4	1	1	0	0	0	1	0	0	1	0	0	0	1	2	4	4	4	5	6	5	5	5	5	5	5	5	4	4	4	4
2021-10-09 12:24:21	410	1	54	1	5	34	1	1	0	0	0	1	1	1	1	1	1	1	1	1	1	0	0	0	1	0	0	0	0	1	0	1	1	4	6	6	5	5	5	5	6	5	6	5	5	3	2	4	4
2021-10-09 12:25:07	973	1	57	1	4	34	0	0	0	1	0	1	1	1	1	4	4	4	4	4	1	1	0	0	0	0	0	0	0	1	0	2	1	3	6	6	6	6	6	6	6	6	6	6	6	6	6	6	6
2021-10-09 12:29:50	492	1	49	1	4	23	0	0	1	0	0	1	1	4	4	4	4	4	4	4	4	0	0	0	0	0	0	0	0	1	0	1	1	6	6	6	6	6	6	1	6	6	6	6	4	5	3	5	1
2021-10-09 12:39:59	911	1	55	1	5	32	0	0	0	1	0	1	1	4	1	4	4	4	4	4	4	1	0	0	0	0	0	0	1	0	0	1	2	6	6	1	1	3	3	2	1	1	4	5	1	6	3	1	1
2021-10-09 12:51:54	1342	2	50	1	5	23	0	1	0	0	0	1	1	1	1	1	1	1	1	1	1	1	0	0	1	0	0	0	0	1	0	1	1	5	5	6	3	5	5	6	5	5	5	3	4	4	3	4	5
2021-10-09 12:52:07	443	1	50	1	5	27	0	0	1	0	0	1	1	1	1	1	1	1	1	1	1	0	0	0	1	0	0	0	0	1	0	1	1	5	6	6	6	6	6	6	5	6	6	6	6	6	6	6	6
2021-10-09 12:57:55	999	1	54	1	5	21	0	0	1	0	0	1	5	5	5	5	5	5	5	5	5	1	0	0	1	0	0	0	0	1	0	1	2	5	3	5	5	5	5	5	3	4	5	3	3	4	4	4	3
2021-10-09 13:01:20	636	2	48	1	5	25	1	0	0	0	0	4	5	4	1	5	5	5	5	5	5	0	1	0	0	0	0	0	0	0	0	1	1	4	4	5	4	5	5	4	5	5	5	5	5	4	4	4	4
2021-10-09 13:02:36	467	1	42	1	4	16	0	1	0	0	0	1	1	1	1	1	1	1	1	1	1	1	0	0	0	0	0	0	0	0	0	1	1	3	1	1	1	1	1	1	6	6	6	2	4	5	5	6	6
2021-10-09 13:07:35	855	1	48	1	4	26	0	0	1	0	0	1	1	1	1	5	5	5	5	5	5	1	0	0	0	0	0	0	0	1	0	2	1	2	6	5	5	5	5	6	6	6	5	5	6	5	5	5	5
2021-10-09 13:23:37	272	2	37	1	3	8	1	0	0	0	0	3	5	1	1	1	1	1	1	1	1	1	0	0	1	0	0	0	0	1	0	1	1	3	6	6	6	6	6	6	6	6	6	6	6	6	6	6	6
2021-10-09 13:47:00	771	1	35	2	3	4	0	0	1	0	0	3	1	4	1	4	4	4	4	4	4	1	0	0	0	0	0	0	0	1	0	2	2	1	6	6	6	6	6	6	4	5	6	4	4	6	6	5	5
2021-10-09 14:08:51	492	1	44	1	3	18	0	0	1	0	0	1	1	1	4	4	3	3	3	3	3	1	0	0	0	0	0	0	0	1	0	1	1	4	3	3	3	4	5	4	5	5	6	6	4	3	2	2	3
2021-10-09 14:11:51	436	1	50	1	5	26	0	0	1	0	0	1	1	1	1	1	1	3	4	1	1	1	0	0	0	0	0	0	0	0	0	1	1	1	4	6	4	4	4	4	4	4	4	4	4	4	4	4	4
2021-10-09 14:16:26	356	1	38	1	2	13	0	0	0	1	0	2	1	1	4	4	1	3	3	3	3	1	0	0	0	0	0	0	0	0	0	1	1	3	4	3	4	4	5	4	4	4	5	5	5	4	4	4	5
2021-10-09 14:31:46	507	1	52	1	5	24	0	0	1	0	0	1	1	1	1	1	1	1	1	1	1	1	0	0	0	0	0	1	0	1	0	1	1	3	4	4	4	4	4	1	5	3	6	5	6	6	4	4	6
2021-10-09 14:35:49	1926	2	51	1	4	11	1	0	0	0	0	2	1	1	1	1	4	1	4	1	4	0	1	0	0	0	0	0	0	0	1	1	1	3	3	5	3	3	3	4	4	3	4	5	4	3	3	3	3
2021-10-09 14:47:06	517	2	46	1	4	18	1	0	0	0	0	1	1	1	1	1	1	1	1	1	1	1	1	1	1	0	0	0	0	1	0	1	1	5	6	6	6	6	6	6	6	6	6	6	6	6	6	6	6
2021-10-09 15:07:36	1447	1	58	1	5	37	1	0	0	0	0	1	1	1	1	1	2	2	2	2	1	1	1	0	1	0	0	0	0	1	0	1	1	5	6	6	4	4	5	4	4	4	5	4	5	5	5	5	4
2021-10-09 15:11:07	1373	1	44	1	4	14	0	0	1	0	0	2	1	1	1	1	1	1	1	1	1	1	0	0	1	0	0	0	0	0	0	1	1	4	3	6	3	3	3	3	3	3	3	3	3	3	3	5	3
2021-10-09 15:34:24	1137	2	56	1	5	33	0	0	1	0	0	1	1	1	4	1	4	4	4	4	4	1	0	0	1	0	0	0	0	1	0	1	1	6	5	5	5	5	5	5	6	6	6	6	5	4	4	4	3
2021-10-09 15:49:44	581	1	46	1	5	26	1	0	0	0	0	1	5	5	1	1	5	5	5	1	1	0	1	1	0	0	0	0	0	1	0	1	1	5	6	5	5	5	4	5	5	5	5	2	3	5	1	4	5
2021-10-09 17:12:51	643	2	37	1	3	8	1	1	0	0	0	3	1	1	4	4	4	4	4	4	4	1	0	0	0	0	0	0	0	0	0	1	2	3	3	5	4	5	5	2	4	5	5	6	5	5	3	3	3
2021-10-09 18:01:06	516	1	50	1	5	25	1	0	0	0	0	1	1	1	1	1	1	1	4	4	4	1	0	0	0	0	0	0	0	1	0	1	1	3	3	6	4	4	5	6	5	6	6	2	6	2	6	3	6
2021-10-09 18:27:18	567	2	47	1	5	21	1	1	0	0	0	1	1	1	1	1	1	1	4	1	4	0	1	1	0	0	0	0	0	0	0	1	1	6	6	6	6	6	6	6	4	6	6	6	6	6	3	3	3
2021-10-09 18:31:55	469	1	49	1	5	27	1	0	0	0	0	1	1	1	4	4	4	4	4	4	4	0	0	0	0	0	0	0	0	0	1	1	1	5	5	5	5	5	5	3	5	5	5	5	5	5	5	5	5
2021-10-09 18:32:49	283	2	39	1	3	1	1	0	0	0	0	1	4	4	1	4	4	3	3	3	1	0	1	1	0	0	0	0	0	0	0	1	2	3	5	6	4	4	4	4	5	5	5	5	3	3	3	3	3
2021-10-09 18:34:57	392	1	32	1	3	3	1	0	0	0	0	4	1	1	4	4	4	4	4	4	4	1	0	0	1	0	0	0	0	0	0	1	1	5	6	6	3	4	3	6	5	5	5	4	5	4	4	5	5
2021-10-09 18:39:24	209	1	25	1	2	2	0	0	0	1	0	4	1	1	1	1	1	1	1	1	1	0	1	1	0	0	0	0	0	0	0	1	1	6	6	6	6	6	6	6	6	6	6	6	6	6	6	6	6
2021-10-09 19:14:43	1242	1	65	1	5	20	1	0	0	0	0	1	5	1	1	1	4	4	4	5	5	1	0	0	1	0	0	0	0	1	1	1	1	4	4	4	3	4	3	5	4	3	3	3	4	4	3	3	4
2021-10-09 19:23:34	276	2	45	1	4	25	1	0	0	0	0	1	3	1	3	3	3	3	4	3	4	1	0	0	0	0	0	0	0	1	0	1	2	4	5	6	6	5	5	5	5	5	5	4	3	3	3	3	4
2021-10-09 19:31:44	668	1	53	1	5	25	1	0	0	0	0	1	1	1	1	1	1	1	1	1	1	0	1	1	0	0	0	0	0	0	0	1	2	1	6	6	4	4	5	6	5	5	5	5	5	3	4	3	3
2021-10-09 20:08:15	599	2	36	1	4	10	1	0	0	0	0	2	1	1	3	3	1	3	3	3	3	1	0	0	0	0	0	0	0	0	0	1	2	3	4	4	4	4	4	4	5	5	5	5	5	5	5	5	5
2021-10-09 20:11:47	354	1	45	1	5	16	0	0	1	0	0	2	1	1	1	4	3	4	2	1	4	1	0	0	0	0	0	0	0	1	0	1	1	4	6	6	4	5	5	5	5	5	5	5	5	5	5	5	6
2021-10-09 20:26:34	1239	2	34	1	6	10	0	0	0	1	0	3	1	4	4	4	3	4	4	4	1	0	0	0	0	0	0	0	0	0	1	1	1	4	4	4	4	5	4	4	4	4	5	5	4	4	4	4	4
2021-10-09 22:21:50	299	1	44	1	4	14	1	0	0	0	0	1	1	3	1	1	1	3	1	1	1	0	1	1	0	0	0	0	0	0	0	1	2	4	3	5	3	4	4	6	3	3	3	3	3	2	2	3	3
2021-10-09 22:41:42	938	2	46	1	4	25	1	0	0	0	0	1	1	1	1	1	1	1	1	1	1	1	0	0	0	0	0	0	0	1	1	1	2	4	6	6	6	6	6	6	6	6	6	6	3	3	3	6	6
2021-10-09 23:39:21	446	1	45	1	4	2	1	0	0	0	0	1	1	1	4	4	4	4	4	4	4	0	0	0	0	0	0	0	0	0	1	1	2	3	2	3	4	4	5	3	2	2	4	3	3	2	3	3	3
2021-10-09 23:49:59	269	2	36	1	4	7	1	0	0	0	0	2	1	1	4	3	3	4	3	1	4	1	0	0	0	0	0	0	0	1	0	1	1	4	6	6	6	4	4	6	6	6	6	6	6	6	6	6	6
2021-10-10 06:06:07	645	2	41	1	3	12	0	0	1	0	0	2	1	1	4	4	1	4	4	1	3	1	1	1	0	0	0	0	0	1	0	2	1	5	4	4	5	5	5	5	5	4	6	6	5	4	5	6	4
2021-10-10 07:06:54	604	1	55	1	4	31	1	0	0	0	0	1	1	1	1	1	1	1	1	1	1	0	1	0	0	0	0	0	0	0	0	1	2	4	4	5	4	5	4	4	4	4	5	4	4	4	4	4	4
2021-10-10 07:53:14	571	2	3	2	4	15	0	0	0	1	0	2	1	4	1	4	4	4	4	1	4	1	1	1	0	0	0	0	0	1	0	1	1	4	4	6	2	3	5	6	4	2	6	6	4	4	5	6	5
2021-10-10 09:33:39	584	2	40	1	4	16	1	0	0	0	0	1	1	5	1	5	1	1	4	1	4	0	1	0	0	0	0	0	0	0	0	1	1	5	5	6	5	5	6	5	5	5	6	6	6	6	4	5	6
2021-10-10 10:08:37	1777	1	55	1	5	20	1	0	0	0	0	1	5	1	1	3	1	3	4	1	3	0	0	0	1	0	1	0	0	1	0	1	1	3	5	6	4	4	5	4	4	5	4	4	4	4	5	5	5
2021-10-10 11:04:15	447	2	42	1	4	18	0	0	1	0	0	1	1	4	4	4	4	4	4	4	4	1	0	0	0	0	0	0	0	0	0	1	1	4	4	4	4	4	4	4	2	2	5	5	5	5	5	4	4
2021-10-10 11:08:00	529	1	49	1	5	24	1	0	0	0	0	1	1	1	1	1	3	4	4	4	4	1	1	0	0	0	0	0	0	1	0	1	1	5	6	6	4	5	5	6	6	6	6	6	6	6	6	6	6
2021-10-10 11:17:42	1048	1	56	1	5	25	1	0	0	0	0	1	1	1	1	1	1	1	1	1	1	1	0	0	0	0	0	0	0	1	0	1	1	6	6	5	5	6	5	5	6	6	6	6	6	6	4	4	6
2021-10-10 14:29:57	686	1	47	1	4	23	0	0	0	1	0	1	1	1	1	1	1	1	1	1	1	1	0	0	0	0	0	0	0	1	0	2	1	5	3	5	5	4	4	4	3	2	5	5	4	4	3	4	4
2021-10-10 17:30:56	439	2	30	1	2	2	0	0	1	0	0	4	1	1	1	1	1	1	1	1	1	0	0	0	1	0	0	0	0	0	0	2	1	4	2	4	3	4	2	2	4	4	4	4	4	4	4	4	4
2021-10-10 22:09:38	760	2	41	1	3	16	0	0	1	0	0	2	1	1	1	1	3	1	4	1	1	0	0	0	1	0	0	0	0	1	0	1	2	2	5	6	5	5	5	3	6	6	6	6	6	4	4	5	5
2021-10-11 08:47:08	697	1	52	1	5	27	1	0	0	0	0	1	1	1	1	1	1	1	1	1	1	1	0	1	1	0	0	0	0	1	0	1	1	5	5	5	4	5	5	5	5	5	5	5	4	4	5	5	4
2021-10-11 09:14:34	1071	2	56	1	5	34	0	1	0	0	0	1	1	4	1	1	1	4	4	1	5	1	1	0	1	0	0	0	0	1	0	1	1	4	5	5	4	4	6	5	5	5	6	5	4	5	5	5	5
2021-10-11 09:39:52	597	2	56	1	1	28	1	0	0	0	0	1	1	1	1	1	4	1	4	4	4	0	0	0	0	1	0	0	0	1	0	1	1	4	5	5	5	6	5	5	5	5	5	6	6	6	6	6	6
2021-10-11 15:18:53	2143	2	53	1	5	31	1	0	0	0	0	3	1	1	1	4	4	4	4	4	4	0	0	1	1	0	1	0	0	0	1	2	1	6	6	5	5	6	5	6	4	4	4	5	4	6	4	5	5
2021-10-11 16:41:25	142	1	45	1	4	16	1	0	0	0	0	1	1	1	2	2	2	2	2	2	3	1	0	0	0	1	0	0	0	0	0	2	1	1	1	1	1	1	3	3	3	3	3	3	3	2	2	3	2
2021-10-11 16:48:43	522	1	40	1	3	16	0	0	0	1	0	2	1	4	1	4	4	4	4	1	4	1	0	0	1	0	0	0	0	1	0	1	1	6	6	6	6	6	6	6	6	6	6	6	6	6	6	6	6
2021-10-11 16:50:05	692	1	43	1	5	15	0	1	0	0	0	2	4	4	4	4	4	4	4	4	4	0	0	0	1	0	0	0	0	1	0	1	1	4	4	6	5	5	6	3	6	6	5	3	5	6	4	6	6
2021-10-11 16:50:22	253	2	34	1	3	4	1	0	0	0	0	2	1	1	1	1	1	1	1	1	1	1	0	0	1	0	0	0	0	0	0	2	2	5	5	5	5	5	5	2	6	6	6	5	5	5	5	6	6
2021-10-11 16:51:03	427	1	33	1	3	3	1	0	0	0	0	4	1	1	1	1	1	1	1	1	1	1	0	0	0	0	0	0	0	0	0	1	1	6	6	6	6	6	6	6	6	6	6	6	6	6	6	6	6
2021-10-11 16:53:27	1099	1	55	1	5	32	0	1	0	0	0	1	1	1	1	1	1	1	1	1	1	1	0	0	1	0	0	0	0	0	0	1	1	6	6	6	4	6	4	6	6	6	6	5	5	5	5	5	5
2021-10-11 16:55:58	732	1	46	1	5	23	1	0	0	0	0	1	3	1	1	3	3	3	3	3	3	0	0	0	0	0	0	0	0	0	1	1	1	6	6	6	6	6	6	6	6	6	6	6	6	6	6	6	6
2021-10-11 16:57:32	551	1	39	1	4	9	1	0	0	0	0	3	1	1	4	4	4	4	4	4	4	1	0	0	1	0	0	0	0	1	0	1	2	4	3	4	3	3	3	3	4	4	4	3	3	4	3	5	5
2021-10-11 16:58:11	1243	1	48	1	5	23	0	0	1	0	0	1	1	4	4	4	4	4	4	4	4	0	0	0	1	0	0	0	0	0	0	2	1	5	6	6	6	6	6	6	6	6	6	6	6	6	6	6	6
2021-10-11 16:59:14	423	1	52	1	5	20	0	1	0	0	0	1	1	1	2	3	3	3	3	3	3	1	0	1	0	0	0	0	0	1	0	2	1	3	6	6	6	6	6	6	6	6	6	6	6	6	6	6	6
2021-10-11 16:59:37	378	1	44	1	4	20	0	0	1	0	0	1	1	1	1	1	1	1	1	1	1	0	0	0	0	0	0	0	0	1	0	1	1	5	6	6	6	6	6	6	6	6	6	6	6	6	6	6	6
2021-10-11 16:59:48	761	2	52	1	5	29	0	1	0	0	0	1	1	1	1	1	1	3	3	3	3	0	1	0	0	0	0	0	0	0	0	1	1	5	1	1	2	2	1	2	5	5	6	1	3	2	1	3	1
2021-10-11 17:00:29	577	1	35	1	3	2	1	0	0	0	0	4	1	1	1	1	1	1	1	1	5	1	0	1	0	0	0	0	0	1	0	1	1	6	6	6	6	6	6	6	6	6	6	6	6	6	6	6	6
2021-10-11 17:01:20	345	1	47	1	3	22	0	0	0	1	0	1	1	2	3	3	3	3	3	3	3	1	0	0	1	0	0	0	0	0	0	1	1	5	5	5	5	5	5	5	5	5	5	5	5	5	5	5	5
2021-10-11 17:02:41	616	1	48	1	5	25	1	0	0	0	0	1	1	1	1	1	1	1	1	1	1	1	0	0	0	0	0	0	0	1	1	1	1	4	5	6	6	6	6	6	6	6	5	3	3	3	2	4	2
2021-10-11 17:03:12	1430	1	66	1	5	20	1	0	1	0	0	1	1	1	1	1	1	4	4	4	4	1	0	0	1	0	0	0	0	1	0	1	1	3	6	6	5	4	4	6	6	6	6	5	6	6	5	5	5
2021-10-11 17:04:26	519	1	40	1	4	20	0	0	1	0	0	1	1	4	4	4	4	4	4	4	4	1	0	0	1	0	0	0	0	1	0	1	2	2	3	1	6	6	5	5	2	4	1	1	5	5	5	1	2
2021-10-11 17:06:20	844	1	54	1	5	32	0	1	0	0	0	1	1	1	1	1	1	1	1	1	1	1	1	0	1	0	0	0	0	0	0	1	1	3	5	6	4	5	4	5	5	5	6	4	5	3	3	5	5
2021-10-11 17:08:01	481	2	41	1	5	14	1	0	0	0	0	2	1	1	1	1	1	1	1	1	1	0	1	1	0	0	0	0	0	0	0	1	1	5	5	5	5	5	5	5	4	4	4	4	4	4	4	4	5
2021-10-11 17:09:24	408	1	44	1	4	21	1	1	0	0	0	1	1	1	4	4	4	4	4	4	4	1	0	0	1	0	0	0	0	0	0	1	1	6	6	6	6	6	5	5	5	5	5	4	4	5	4	5	5
2021-10-11 17:10:20	540	1	41	1	3	18	0	0	1	0	0	2	1	1	1	2	1	1	4	3	3	1	0	0	1	0	0	0	0	0	0	1	2	3	6	6	4	5	6	4	6	5	6	6	4	4	5	5	4
2021-10-11 17:12:51	354	1	42	1	4	17	1	1	0	0	0	2	1	1	2	1	1	1	1	1	1	1	0	0	1	0	0	0	0	0	0	1	1	5	5	5	5	4	3	5	5	4	5	4	4	5	3	4	4
2021-10-11 17:13:27	621	1	39	1	4	2	1	0	0	0	0	2	1	1	1	1	1	4	4	4	4	1	1	0	0	0	0	0	0	1	0	1	1	5	6	6	6	6	6	4	6	6	6	6	6	6	6	6	6
2021-10-11 17:16:08	750	2	46	1	3	18	0	0	1	0	0	1	1	1	5	5	5	5	5	5	1	1	0	0	1	0	0	0	0	1	0	1	2	4	5	6	5	6	5	5	5	5	5	4	4	4	4	4	4
2021-10-11 17:16:36	654	1	58	1	5	34	0	0	0	1	0	1	1	4	3	4	3	4	4	4	4	1	0	0	1	0	0	0	0	0	0	2	1	6	6	6	4	5	5	4	6	5	6	5	5	4	4	4	4
2021-10-11 17:16:48	934	2	31	1	3	5	0	0	1	0	0	4	1	4	4	4	4	4	4	4	2	0	0	0	1	0	0	0	0	1	0	1	1	5	5	5	5	5	5	5	5	5	5	5	5	5	5	5	5
2021-10-11 17:17:39	632	2	39	1	3	11	1	0	0	0	0	2	1	1	1	1	1	1	4	1	4	1	0	0	1	0	0	0	0	0	0	1	1	6	4	6	5	6	6	5	5	5	6	4	5	5	5	5	5
2021-10-11 17:21:35	476	1	42	1	4	16	0	1	0	0	0	2	4	3	4	4	1	4	4	4	4	0	0	0	1	0	0	0	0	0	0	1	1	5	4	5	4	4	3	4	3	5	5	3	4	3	3	4	4
2021-10-11 17:23:55	446	2	30	1	3	1	1	0	0	0	0	4	1	1	4	4	4	4	4	4	4	1	0	0	0	0	0	0	0	0	0	3	2	5	6	6	5	5	5	6	6	6	6	4	3	3	3	5	5
2021-10-11 17:24:57	1483	1	48	1	4	21.5	1	0	0	0	0	1	4	3	1	4	3	4	4	4	4	0	1	0	0	0	0	0	0	0	0	1	1	5	3	6	3	3	3	1	1	1	3	3	4	4	2	3	3
2021-10-11 17:25:06	553	2	43	1	4	12	1	0	0	0	0	2	3	1	3	4	3	3	3	4	5	1	0	0	0	0	0	0	0	0	0	2	1	4	3	6	6	6	3	3	6	6	6	6	6	6	4	6	6
2021-10-11 17:27:06	673	2	52	1	5	28	0	0	1	0	0	1	1	1	1	1	1	1	1	1	1	0	0	0	0	0	0	0	0	1	0	1	1	4	6	6	6	6	6	6	6	6	6	6	6	4	1	6	6
2021-10-11 17:28:07	371	1	60	1	5	34	0	0	0	1	0	1	1	1	1	1	1	1	1	1	1	0	0	0	0	0	0	0	0	1	0	2	1	4	1	1	1	1	1	1	1	1	1	1	1	1	1	1	1
2021-10-11 17:28:27	463	2	35	1	3	6	0	0	1	0	0	4	1	1	1	2	3	3	3	1	3	0	0	0	0	0	0	0	0	0	1	2	2	3	4	4	4	4	4	4	3	3	5	5	3	3	3	5	5
2021-10-11 17:29:16	578	1	40	1	4	15	0	0	0	1	0	3	1	1	1	1	1	1	1	1	1	1	0	0	0	0	0	0	0	1	0	2	1	6	6	6	6	6	5	5	5	5	6	6	5	5	5	5	5
2021-10-11 17:30:57	515	1	48	1	3	25	0	1	0	0	0	1	4	1	4	4	4	1	4	4	4	1	0	0	1	0	0	0	0	1	0	1	1	3	2	5	4	5	4	5	3	3	4	4	4	4	4	4	3
2021-10-11 17:33:37	307	1	42	1	4	8	1	0	0	0	0	1	1	1	1	1	1	1	1	1	1	1	0	0	1	0	1	0	0	0	0	1	2	5	5	5	4	5	5	5	2	2	5	4	5	6	6	4	5
2021-10-11 17:34:00	595	1	44	1	4	18	0	0	1	0	0	1	1	1	1	1	1	4	4	1	4	1	0	0	1	0	0	0	0	1	0	1	1	5	5	6	5	6	6	4	5	5	6	6	5	5	4	4	4
2021-10-11 17:34:05	986	2	55	1	5	30	1	0	0	0	0	1	1	1	1	1	1	1	1	1	1	0	1	1	0	0	0	0	0	0	0	1	1	4	6	5	6	6	4	4	4	4	5	4	4	6	3	4	4
2021-10-11 17:34:33	388	2	35	1	3	7	0	0	0	1	0	3	1	1	1	1	1	1	1	1	1	1	0	0	0	0	0	0	0	0	0	1	2	3	3	5	5	5	4	3	2	2	4	2	3	2	2	2	1
2021-10-11 17:35:43	1216	1	33	1	2	8	0	0	0	1	0	3	1	1	3	3	3	4	3	4	3	1	0	0	0	0	0	0	0	0	0	2	1	3	4	6	3	2	4	3	5	5	6	5	5	4	4	4	4
2021-10-11 17:36:15	1345	1	68	1	5	20	0	0	1	0	0	1	1	1	3	3	2	1	4	4	4	1	0	0	0	0	0	0	0	1	0	1	1	5	5	5	4	6	4	5	4	5	5	4	6	6	4	5	6
2021-10-11 17:38:20	482	2	40	1	4	11	0	1	0	0	0	1	2	4	4	4	4	4	4	4	4	0	0	0	0	0	0	0	0	0	1	1	1	3	6	5	5	6	6	6	3	5	6	3	5	6	4	4	5
2021-10-11 17:38:24	546	2	47	1	4	23	0	0	1	0	0	1	1	1	1	1	1	1	1	1	1	0	1	1	0	0	0	0	0	0	0	1	1	5	3	6	3	6	4	3	4	4	6	5	5	5	5	4	4
2021-10-11 17:40:45	2706	1	40	1	3	3	1	0	0	0	0	1	1	1	4	4	4	4	4	4	4	0	0	0	1	0	0	0	0	1	0	1	1	6	5	6	5	5	5	4	6	6	6	6	6	6	6	6	6
2021-10-11 17:40:49	238	2	40	1	5	10	0	1	0	0	0	3	1	1	3	3	3	3	3	3	3	1	0	0	0	0	0	0	0	0	0	1	1	6	3	3	3	4	6	6	4	4	4	4	4	4	4	4	4
2021-10-11 17:41:40	581	2	50	1	4	11	1	0	0	0	0	2	1	1	3	3	3	1	4	1	1	0	1	0	0	0	0	1	0	0	0	1	2	4	3	4	4	3	4	4	4	4	4	4	4	3	3	3	3
2021-10-11 17:44:07	543	1	51	1	4	25	0	0	1	0	0	1	1	1	1	1	1	1	1	1	1	0	1	1	0	0	0	1	0	0	0	2	2	2	3	4	2	3	4	3	4	4	3	3	3	4	4	3	4
2021-10-11 17:44:34	822	1	45	1	5	18	0	0	1	0	0	1	1	1	4	4	4	4	4	4	4	1	0	0	0	0	0	0	0	1	0	1	1	5	5	6	5	5	5	6	6	6	5	5	5	5	4	6	6
2021-10-11 17:48:51	505	1	40	1	3	14	0	0	0	1	0	2	1	3	1	3	3	3	3	3	3	1	0	0	0	0	0	0	0	1	0	2	1	1	4	6	5	6	6	4	6	5	6	5	5	4	4	5	3
2021-10-11 17:49:32	225	2	33	1	3	5	1	0	0	0	0	4	3	3	3	3	3	3	3	3	3	0	0	0	1	0	0	0	0	0	0	1	2	2	2	6	2	2	2	2	6	6	6	6	6	6	6	6	6
2021-10-11 17:49:34	614	2	40	1	5	13	0	0	1	0	0	2	1	1	1	1	1	1	1	1	1	1	1	1	0	0	0	0	0	1	0	1	1	4	2	2	2	2	2	1	6	6	6	6	1	1	2	2	4
2021-10-11 17:50:47	786	1	57	1	5	33	0	1	0	0	0	1	1	1	1	1	1	1	1	1	1	0	0	0	1	0	0	0	0	0	0	1	1	6	6	6	6	6	6	6	6	6	6	6	6	6	6	6	6
2021-10-11 17:51:37	249	1	56	1	5	34	0	0	0	1	0	1	1	1	1	1	1	1	1	1	1	1	0	0	0	0	0	0	0	1	0	1	1	3	1	1	1	1	1	1	1	3	3	1	1	1	1	1	1
2021-10-11 17:56:16	758	2	46	1	5	22	1	0	0	0	0	1	1	1	3	3	1	3	4	4	4	1	0	0	1	0	0	0	0	1	0	1	1	4	6	6	5	6	5	5	6	5	6	6	6	6	5	5	5
2021-10-11 17:57:55	409	2	32	1	3	4	0	0	1	0	0	4	3	3	3	3	3	3	3	3	3	0	1	0	0	0	0	0	0	0	0	1	1	4	5	6	5	5	5	2	6	5	5	4	5	6	6	6	6
2021-10-11 17:58:16	351	1	46	1	4	22	0	0	0	1	0	1	1	1	1	3	3	3	3	3	3	0	0	1	1	0	0	0	0	1	0	2	2	3	4	4	4	4	4	4	5	5	5	5	5	5	5	5	5
2021-10-11 17:58:28	481	2	44	1	5	14	1	0	0	0	0	2	4	4	5	5	4	4	4	4	4	0	1	0	0	0	0	0	0	0	0	1	1	5	6	6	6	6	5	5	6	6	6	5	5	5	5	5	5
2021-10-11 18:00:10	1028	1	65	1	1	26	0	1	0	0	0	1	1	1	1	1	3	3	2	3	3	1	0	0	1	0	0	0	0	1	0	1	1	6	6	6	6	6	5	6	6	6	6	5	6	6	5	6	6
2021-10-11 18:01:07	564	1	34	1	1	2	1	0	0	0	0	4	4	4	1	4	4	4	4	1	4	0	1	0	0	0	0	0	0	0	0	1	1	6	6	6	6	6	5	4	5	5	6	6	6	5	5	6	5
2021-10-11 18:06:03	2087	2	35	1	3	10	0	0	1	0	0	3	1	1	1	1	4	4	4	4	4	1	1	0	0	0	0	0	0	0	0	1	2	4	6	6	6	6	6	6	6	6	6	6	6	6	6	6	6
2021-10-11 18:07:16	401	1	57	1	5	15	1	0	0	0	0	3	1	1	1	1	1	1	4	3	4	0	1	0	0	0	0	0	0	0	0	1	2	5	5	2	5	5	3	5	2	4	4	4	4	2	2	2	4
2021-10-11 18:08:22	371	2	42	1	3	10	1	0	0	0	0	2	1	1	1	1	1	1	1	1	1	1	0	0	1	0	0	0	0	1	0	1	1	3	5	6	5	5	5	5	6	6	6	6	6	6	6	6	6
2021-10-11 18:09:16	351	1	41	1	3	12	0	0	1	0	0	2	1	4	4	4	4	4	4	4	4	1	1	1	0	0	0	0	0	0	0	1	1	1	5	5	5	5	5	5	5	5	5	5	5	5	5	5	5
2021-10-11 18:14:00	263	2	26	1	2	1	0	0	1	0	0	4	4	4	4	4	4	4	4	4	4	0	1	0	1	0	0	0	0	0	0	1	1	3	3	6	5	5	3	3	4	5	5	5	5	5	5	5	6
2021-10-11 18:21:11	430	2	45	1	4	11	0	0	1	0	0	3	1	1	1	1	1	1	1	1	1	0	0	0	0	0	0	0	0	1	0	1	2	1	3	3	5	5	4	4	6	2	6	5	4	3	2	2	1
2021-10-11 18:21:16	613	1	42	1	4	18	0	0	1	0	0	1	1	2	3	5	2	3	4	4	1	1	0	0	1	0	1	0	0	1	0	2	1	3	4	4	4	4	4	1	4	3	3	3	3	2	2	3	2
2021-10-11 18:22:02	657	1	32	1	4	4	1	0	0	0	0	4	2	1	1	1	1	1	1	1	1	0	1	1	0	0	0	0	0	0	0	1	1	6	6	6	6	6	6	6	6	6	6	6	6	6	6	6	6
2021-10-11 18:23:00	533	1	45	1	3	21	1	0	0	0	0	1	1	1	1	1	1	1	1	1	1	1	0	0	1	0	0	0	0	1	0	1	1	3	1	1	1	1	1	1	3	3	3	5	5	5	3	3	3
2021-10-11 18:25:27	841	2	34	1	3	3	1	0	0	0	0	4	5	1	1	1	1	1	1	1	1	1	0	0	0	0	0	0	0	0	0	1	1	6	6	6	6	6	6	6	6	6	6	6	6	6	6	6	6
2021-10-11 18:25:32	661	1	57	1	4	37	0	0	0	1	0	1	1	1	1	1	1	1	1	1	1	0	1	1	0	0	0	0	0	1	0	1	2	3	2	5	3	4	3	1	2	2	5	3	3	2	2	2	2
2021-10-11 18:26:16	497	1	44	1	5	19	1	0	0	0	0	1	1	1	1	1	4	4	4	4	4	1	0	0	0	0	0	0	0	0	1	1	1	4	4	5	3	4	4	5	3	3	3	2	5	4	3	4	4
2021-10-11 18:27:20	1061	1	46	2	3	4	1	0	0	0	0	4	5	4	5	5	5	5	5	5	5	0	1	0	0	0	0	0	0	0	0	1	1	6	5	6	4	5	3	6	5	6	4	5	5	6	5	4	4
2021-10-11 18:29:12	868	2	44	1	4	17	1	0	0	0	0	1	1	1	1	1	1	4	4	1	4	1	0	0	0	0	1	0	0	0	0	1	1	5	5	5	5	5	5	5	3	5	5	5	5	5	4	5	5
2021-10-11 18:33:21	634	2	48	1	5	16	1	0	0	0	0	2	1	1	2	3	1	1	3	1	4	1	0	0	1	0	0	0	0	0	0	2	2	5	5	4	4	5	4	6	5	6	5	5	6	5	5	5	6
2021-10-11 18:34:37	456	1	31	1	3	3	1	0	0	0	0	4	1	1	1	1	1	1	1	1	1	1	0	0	0	0	0	0	0	0	0	1	1	5	5	5	5	5	5	5	5	5	5	5	5	5	5	5	5
2021-10-11 18:34:46	475	2	45	1	4	21	0	1	0	0	0	1	1	1	1	1	1	1	1	1	1	1	1	1	0	0	0	0	0	0	0	2	1	2	4	5	2	3	4	5	5	5	5	6	6	6	6	6	6
2021-10-11 18:34:53	547	1	48	1	4	27	0	0	1	0	0	1	1	1	1	1	4	1	1	1	1	0	0	0	1	0	0	1	0	1	0	1	2	3	1	1	6	6	6	1	6	6	6	6	6	6	6	6	6
2021-10-11 18:35:37	570	2	33	1	3	2	0	1	0	0	0	4	4	4	1	4	4	4	4	1	4	0	1	0	0	0	0	0	0	0	0	1	1	4	6	6	6	6	6	6	6	6	6	6	6	6	6	6	6
2021-10-11 18:35:46	692	2	44	1	3	13	1	0	0	0	0	2	5	1	1	1	1	4	4	1	1	1	0	0	0	0	0	0	0	1	0	1	1	5	4	6	3	5	6	4	5	5	6	5	5	5	5	4	4
2021-10-11 18:38:08	473	2	34	1	4	9	0	0	1	0	0	2	5	3	1	1	4	4	4	1	3	0	0	0	0	0	0	0	0	1	0	1	2	4	4	5	6	6	5	2	5	6	5	5	6	6	4	6	6
2021-10-11 18:39:53	520	1	48	1	4	20	0	1	0	0	0	1	1	1	1	1	1	1	1	1	1	1	1	0	0	0	0	0	0	0	0	1	1	2	1	2	5	5	6	6	3	3	5	4	5	5	6	6	6
2021-10-11 18:40:46	684	2	30	2	2	2	0	0	1	0	0	4	1	1	1	1	1	1	1	1	1	0	1	1	0	0	0	0	0	0	0	1	1	6	3	5	3	5	3	1	6	6	6	5	4	5	3	6	4
2021-10-11 18:41:00	616	2	47	1	4	21	1	0	0	0	0	1	1	1	1	1	1	1	1	1	1	0	1	0	0	0	0	0	0	0	0	1	1	3	3	3	4	4	3	3	5	4	5	5	5	1	3	4	4
2021-10-11 18:43:31	283	2	40	1	4	17	0	0	1	0	0	1	1	1	1	1	3	3	3	1	1	1	1	0	0	0	0	0	0	0	0	1	1	2	6	6	6	6	6	6	6	6	6	6	6	6	6	6	6
2021-10-11 18:43:39	273	1	36	1	3	11	0	1	0	0	0	3	1	1	1	1	1	1	1	1	1	0	0	0	1	0	0	0	0	0	0	2	2	5	2	3	2	4	5	3	5	5	5	5	5	5	5	5	4
2021-10-11 18:44:25	591	2	47	1	5	22	1	0	0	0	0	1	5	5	5	5	5	5	5	5	5	1	0	0	0	0	0	0	0	1	0	1	1	6	6	6	6	6	6	6	6	6	6	6	6	6	6	6	6
2021-10-11 18:45:39	948	2	38	1	4	9	1	0	0	0	0	3	1	1	1	1	1	3	4	1	1	0	0	0	0	0	0	0	0	1	0	2	1	6	3	6	5	5	3	3	3	3	4	4	2	2	2	4	4
2021-10-11 18:46:03	645	2	45	1	3	15	0	0	1	0	0	2	1	1	1	1	1	1	1	1	1	0	1	1	0	0	0	0	0	0	0	1	2	3	5	4	6	5	4	6	6	6	6	6	5	5	5	5	5
2021-10-11 18:46:45	618	2	37	2	3	13	0	0	0	1	0	3	3	4	2	4	4	2	3	3	3	1	0	0	0	0	0	0	0	0	1	1	1	5	5	5	1	1	6	1	2	2	6	6	2	2	3	2	3
2021-10-11 18:51:25	733	1	38	1	3	14	0	0	0	1	0	2	3	3	3	3	4	4	4	4	4	1	0	0	0	0	0	0	0	0	0	2	2	4	4	5	5	5	4	4	4	4	4	4	4	4	4	4	4
2021-10-11 18:51:38	2021	2	42	1	4	15	1	0	0	0	0	2	4	4	1	4	4	4	4	1	4	0	1	0	0	0	0	0	0	0	0	1	1	6	5	5	6	6	6	5	6	6	6	6	6	6	5	6	6
2021-10-11 19:07:42	669	1	55	1	4	32	0	1	0	0	0	1	1	1	4	4	1	1	1	1	1	0	0	0	1	0	0	0	0	0	0	1	1	5	5	6	5	5	5	5	4	4	5	4	4	5	5	5	5
2021-10-11 19:17:30	573	2	44	1	4	16	1	0	0	0	0	2	1	1	1	1	1	1	1	1	1	1	1	1	0	0	0	0	0	0	0	1	1	6	2	5	3	3	6	6	3	6	6	3	2	6	5	1	3
2021-10-11 19:22:53	380	1	55	1	3	31	0	0	0	1	0	1	1	1	3	3	4	4	4	4	4	1	0	0	1	0	0	0	0	0	0	1	1	5	6	6	6	6	6	6	6	6	6	6	6	6	6	6	6
2021-10-11 19:23:04	596	2	47	1	4	4	0	0	1	0	0	4	3	4	4	4	4	4	4	4	4	1	0	0	1	0	0	0	0	1	0	1	1	6	6	6	6	6	6	6	6	6	6	6	6	6	6	6	6
2021-10-11 19:25:32	311	1	29	1	3	1	1	0	0	0	0	4	1	1	1	1	1	1	1	1	1	0	0	0	0	0	0	0	0	1	0	2	1	6	5	6	4	4	5	5	6	6	6	6	4	4	4	5	5
2021-10-11 19:28:43	715	2	50	1	5	10	0	1	0	0	0	3	1	1	5	1	2	1	2	2	2	0	1	0	0	0	0	0	0	0	0	2	2	2	4	5	4	5	4	5	5	5	5	5	5	5	5	5	5
2021-10-11 19:28:43	573	2	41	1	4	14	1	0	0	0	0	1	1	1	1	1	1	1	1	1	1	0	0	1	0	0	0	0	0	0	0	1	1	5	6	6	4	4	6	4	6	6	6	6	6	6	3	3	3
2021-10-11 19:40:16	451	2	50	1	5	15	1	0	0	0	0	2	1	1	1	1	1	1	1	1	1	1	0	1	1	0	0	0	0	0	0	1	1	6	6	6	6	6	6	6	6	6	6	6	5	5	5	6	6
2021-10-11 20:10:59	1669	2	58	1	5	33	0	0	1	0	0	1	4	4	4	4	1	1	1	1	1	1	0	0	1	0	0	0	0	0	0	1	1	3	3	3	3	3	3	3	5	4	5	4	4	4	4	5	5
2021-10-11 20:17:10	354	2	40	1	4	10	0	0	1	0	0	3	1	3	1	4	4	3	4	4	1	1	1	0	0	0	0	0	0	1	0	1	2	5	5	5	4	4	6	5	5	5	6	6	6	6	6	6	6
2021-10-11 20:23:15	1335	1	50	1	4	24	1	0	0	0	0	3	2	4	1	4	4	4	4	1	1	0	1	0	0	0	0	0	0	0	0	2	1	4	4	5	4	4	4	4	4	4	4	4	5	5	4	4	5
2021-10-11 20:27:58	461	1	50	1	3	24	0	0	0	1	0	1	4	4	4	3	1	4	4	4	4	1	0	1	1	0	1	0	0	1	0	2	1	5	1	6	6	6	6	6	6	6	6	6	6	6	6	6	6
2021-10-11 20:29:47	911	2	48	1	4	18	0	1	0	0	0	1	1	1	1	1	1	1	1	1	1	0	1	1	0	0	0	0	0	0	0	1	2	5	5	6	4	5	5	5	6	6	6	5	6	6	6	6	5
2021-10-11 20:49:39	755	1	45	1	4	18	1	0	0	0	0	3	1	4	4	4	4	4	4	4	5	1	0	0	0	1	0	0	0	1	0	1	1	3	3	5	5	5	5	4	5	5	5	5	4	1	3	5	4
2021-10-11 20:58:04	2016	1	47	1	5	24	1	1	0	0	0	1	1	1	3	3	3	3	3	3	3	1	0	0	0	0	0	0	0	0	0	1	1	4	5	5	4	4	4	4	5	5	5	5	4	4	4	4	4
2021-10-11 21:16:55	425	1	56	1	4	33	0	0	1	0	0	1	1	1	1	4	3	1	1	1	1	1	1	0	0	0	0	0	1	1	0	1	2	6	6	6	5	6	6	6	6	6	6	6	6	6	6	6	1
2021-10-11 21:18:59	674	1	60	1	5	36	0	0	1	0	0	1	1	1	1	1	1	1	1	1	1	1	1	1	1	1	1	1	1	1	0	1	1	5	5	5	4	5	5	5	5	4	5	4	4	4	4	5	4
2021-10-11 21:22:26	867	1	49	1	5	22	0	1	0	0	0	1	1	1	1	1	1	2	3	1	1	0	0	0	1	0	0	0	0	0	0	1	2	5	3	5	2	5	5	6	6	6	5	3	5	5	3	4	4
2021-10-11 21:25:36	875	2	42	1	3	16	1	0	0	0	0	2	4	4	1	4	1	4	4	3	4	0	1	0	0	0	0	0	0	0	0	2	1	4	4	4	4	5	5	5	5	5	4	4	4	4	5	5	5
2021-10-11 21:41:47	17482	1	56	1	5	31	1	0	0	0	0	1	1	1	3	3	4	3	3	3	3	1	1	1	1	0	0	0	0	1	0	1	2	6	6	5	5	5	5	6	6	6	6	5	5	5	6	6	6
2021-10-11 22:13:30	707	1	55	1	3	31	0	0	0	1	0	1	1	1	2	1	1	1	3	1	1	1	0	0	1	1	0	0	0	1	0	1	1	1	5	4	5	3	5	1	6	6	6	1	4	5	2	4	3
2021-10-11 22:24:57	893	1	46	1	3	20	1	0	0	0	0	1	4	4	1	1	1	4	4	1	4	1	0	0	0	0	0	0	0	0	0	2	1	5	5	5	6	6	5	5	5	6	5	4	3	4	3	3	3
2021-10-11 22:36:16	574	1	28	1	2	3	0	0	1	0	0	4	1	1	1	1	1	1	1	1	1	0	0	0	0	0	0	0	0	0	1	1	1	6	6	6	6	6	6	6	6	6	6	6	6	6	6	6	6
2021-10-11 22:40:16	785	1	45	1	4	20	1	0	0	0	0	1	1	1	1	1	4	5	3	1	1	0	0	0	0	0	0	0	0	1	0	1	1	5	4	5	6	6	5	4	3	3	5	5	5	5	5	4	4
2021-10-11 22:59:23	418	2	43	1	5	11	1	1	0	0	0	2	1	1	1	1	1	1	1	1	1	1	0	0	1	0	0	0	0	1	0	1	1	4	6	6	6	6	6	6	6	6	6	6	6	6	6	6	6
2021-10-11 23:05:17	726	2	43	1	5	15	1	0	0	0	0	1	4	4	3	3	4	4	4	4	4	0	1	0	0	0	0	0	0	0	0	1	1	5	6	4	3	3	6	4	5	5	4	5	5	5	4	5	5
2021-10-12 01:25:18	619	1	49	1	4	25	0	0	1	0	0	1	1	4	5	5	5	1	1	1	1	1	0	0	0	0	0	0	1	1	0	1	1	6	6	6	3	5	2	5	6	6	6	5	6	6	4	5	6
2021-10-12 09:19:26	393	2	44	1	3	11	1	0	0	0	0	3	1	1	1	1	1	1	1	1	1	0	1	0	0	0	0	0	0	0	0	1	2	2	3	3	4	4	3	4	5	4	5	6	6	6	5	5	5
2021-10-12 10:18:31	592	2	41	1	3	15	1	0	0	0	0	2	1	1	4	4	4	4	4	4	4	1	0	0	1	0	0	0	0	1	0	1	1	2	6	6	4	4	5	3	6	6	6	6	6	6	5	6	6
2021-10-12 10:45:12	502	2	49	1	5	23	0	1	0	0	0	1	1	1	1	1	1	1	1	1	1	0	1	1	0	0	0	0	0	1	0	1	1	4	5	5	6	6	5	5	5	5	4	4	5	5	5	4	4
2021-10-12 11:06:00	930	2	56	1	5	19	0	1	0	0	0	1	1	1	1	1	1	4	4	1	1	0	0	0	0	0	0	0	0	1	1	1	1	3	6	6	6	6	6	6	6	6	6	6	6	6	6	3	3
2021-10-12 11:59:40	4557	2	32	1	3	5	0	0	1	0	0	4	1	4	4	4	4	4	4	4	4	1	0	0	1	0	0	0	0	0	0	1	1	4	5	5	5	5	5	5	5	5	5	5	5	5	5	5	5
2021-10-12 12:35:21	415	1	45	1	3	15	0	1	0	0	0	2	1	1	1	1	1	1	4	1	1	1	0	1	0	0	1	0	0	1	0	2	1	4	5	6	5	6	6	6	4	4	5	4	5	4	4	4	4
2021-10-12 13:21:44	378	1	35	1	3	10	0	0	1	0	0	3	1	1	1	1	1	1	1	1	1	0	0	0	1	0	0	0	0	1	0	1	1	4	6	6	6	6	6	6	6	6	6	6	6	6	6	6	6
2021-10-12 17:43:30	1195	1	66	1	5	40	0	0	0	1	0	1	1	1	1	1	1	1	1	1	1	0	0	0	1	0	0	0	0	1	0	1	2	4	4	5	4	4	4	4	3	3	5	4	3	3	3	3	4
2021-10-12 17:56:05	670	1	47	1	6	26	0	0	0	1	0	1	3	3	4	4	4	3	4	3	3	1	0	0	0	0	0	0	0	0	0	2	1	1	5	5	5	6	6	5	5	5	5	5	5	5	5	6	5
2021-10-12 20:00:12	575	1	54	1	4	29	1	0	0	0	0	1	1	1	1	1	1	1	4	1	1	1	0	0	1	0	0	0	0	0	0	1	1	3	6	4	4	4	4	6	4	4	5	3	5	5	5	5	4
2021-10-12 22:09:51	943	1	40	1	3	12	0	1	0	0	0	2	1	1	1	1	1	1	4	1	1	0	0	0	0	0	0	0	0	1	0	1	2	3	3	3	3	3	6	6	3	3	6	4	4	3	3	5	6
2021-10-13 10:07:06	288	2	58	1	5	38	0	1	1	1	0	1	1	1	1	1	1	1	1	1	1	0	1	1	0	0	0	0	0	0	0	2	1	3	2	2	2	2	2	2	5	5	5	5	5	5	5	5	5
2021-10-14 22:50:56	682	1	50	1	4	14	0	1	0	0	0	1	1	1	1	1	1	1	1	1	1	0	1	1	0	0	0	0	0	0	0	1	1	6	4	4	4	6	5	4	3	3	3	4	4	4	4	4	4
2021-10-15 00:36:32	496	1	44	1	4	19	0	0	0	1	0	2	3	4	3	4	4	4	4	4	4	1	1	0	0	0	0	0	0	1	0	2	1	4	6	6	3	6	5	6	6	6	6	6	6	6	6	6	6
2021-10-28 20:46:53	591	1	47	1	4	17	0	0	0	1	0	2	1	1	1	1	1	4	4	4	4	1	1	0	0	0	0	0	0	0	0	1	1	3	4	2	4	5	4	3	4	4	4	4	3	3	3	5	5
2021-10-14 08:58:24	203	2	49	1	5	23	0	1	0	0	0	1	-2	-2	1	-2	-2	-2	-2	1	-2	0	1	1	0	0	0	0	0	0	0	1	2	4	5	5	6	6	4	4	5	5	3	4	5	6	5	4	5
2021-10-14 09:34:14	638	2	66	1	5	39	0	0	0	1	0	1	1	1	-2	-2	-2	-2	-2	-2	-2	1	0	0	1	0	1	0	0	1	0	1	1	5	3	5	5	5	4	5	3	2	4	5	5	3	2	2	3
2021-10-14 09:49:36	662	1	40	1	3	6	1	0	0	0	0	4	-2	-2	1	-2	-2	-2	-2	-2	-2	0	1	0	0	0	0	0	0	0	0	1	1	6	4	6	6	6	6	6	6	6	6	6	6	6	6	6	6
2021-10-14 09:49:47	455	2	30	1	3	3	0	0	1	0	0	4	-2	-2	1	-2	-2	-2	-2	1	-2	0	1	1	0	0	0	0	0	0	0	1	1	5	5	5	5	6	6	6	5	6	6	5	5	5	5	6	6
2021-10-14 09:50:42	436	1	36	1	3	4	1	0	0	0	0	4	-2	-2	1	-2	-2	-2	-2	-2	-2	0	1	0	0	0	0	0	0	0	1	1	1	3	4	5	4	5	3	6	5	4	3	5	5	6	2	3	6
2021-10-14 09:55:03	620	2	55	1	5	35	0	0	0	1	0	1	-2	-2	1	-2	-2	-2	-2	1	-2	0	1	1	0	0	0	0	0	0	0	1	1	5	5	6	4	5	6	6	5	5	5	5	6	6	6	5	6
2021-10-14 09:55:27	659	2	49	1	4	16	0	0	1	0	0	4	-2	-2	1	-2	-2	-2	-2	1	-2	0	1	1	0	0	0	0	0	1	0	2	1	3	2	3	3	4	3	1	1	1	2	2	3	2	1	2	3
2021-10-14 09:55:33	537	2	40	1	3	15	0	0	0	1	0	2	-2	-2	-2	-2	-2	-2	-2	-2	-2	1	0	0	0	0	0	0	0	1	0	1	1	5	6	6	6	5	6	5	4	3	6	5	6	6	5	5	4
2021-10-14 09:58:49	276	2	35	1	3	7	0	0	1	0	0	3	-2	-2	-2	-2	-2	-2	-2	-2	-2	1	0	0	0	0	0	0	0	0	0	1	1	5	5	6	5	5	5	5	4	5	6	6	6	5	5	5	5
2021-10-14 10:01:00	667	1	33	1	2	6	0	0	1	0	0	4	3	-2	-2	-2	-2	-2	-2	-2	-2	1	0	0	0	0	0	0	0	1	0	2	1	5	4	6	6	5	4	4	4	4	6	6	6	5	5	5	4
2021-10-14 10:02:07	1252	1	51	1	3	33	0	0	1	0	0	1	1	-2	-2	-2	-2	-2	-2	-2	-2	1	0	0	1	0	0	0	0	0	0	2	1	4	3	5	4	4	3	5	4	4	5	5	4	2	3	4	1
2021-10-14 10:03:02	811	2	38	3	3	10	0	0	1	1	0	4	-2	-2	1	1	-2	-2	-2	1	-2	0	1	1	0	0	0	0	0	0	0	1	1	4	5	5	4	4	4	6	4	4	4	4	4	6	4	4	4
2021-10-14 10:03:57	637	2	34	1	3	8	0	0	1	0	0	3	1	-2	-2	-2	1	-2	-2	-2	-2	0	0	0	0	0	0	0	0	0	1	1	2	3	4	6	4	5	5	6	4	6	5	4	6	5	4	6	6
2021-10-14 10:08:16	383	2	41	1	4	14	1	0	0	0	0	2	1	-2	-2	-2	-2	-2	-2	-2	-2	1	0	0	0	0	0	0	0	0	0	1	1	5	6	6	6	6	6	6	6	6	6	6	6	6	6	6	6
2021-10-14 10:10:07	704	2	34	1	3	6	0	0	1	0	0	4	1	-2	-2	-2	-2	-2	-2	-2	-2	0	0	0	0	0	0	0	0	1	0	1	1	5	4	5	5	5	4	5	5	5	5	3	4	4	4	4	5
2021-10-14 10:23:42	223	2	39	1	4	20	1	0	0	0	0	2	1	-2	-2	-2	-2	-2	-2	-2	-2	1	0	0	0	0	0	0	0	1	0	1	1	3	3	6	4	4	4	6	4	4	4	4	4	4	4	5	5
2021-10-14 10:25:01	764	1	46	1	3	20	0	0	1	0	0	1	3	-2	-2	-2	-2	-2	-2	-2	-2	1	1	1	0	0	0	0	0	0	0	1	1	4	4	5	4	5	5	4	4	4	4	5	4	5	4	4	4
2021-10-14 10:29:10	419	2	48	1	5	20	1	0	0	0	0	1	1	1	1	-2	-2	-2	-2	-2	-2	0	1	0	0	0	0	0	0	0	0	1	1	5	5	5	5	5	5	5	2	4	4	4	4	4	4	4	4
2021-10-14 10:33:25	486	1	37	1	2	13	0	0	0	1	0	2	-2	1	-2	-2	-2	-2	-2	-2	-2	0	0	0	1	0	0	0	0	1	0	1	1	6	6	6	6	6	6	6	6	6	6	6	6	6	6	6	6
2021-10-14 10:33:58	426	1	45	1	4	21	0	0	0	1	0	1	3	-2	3	-2	-2	-2	-2	3	-2	1	1	1	0	0	0	0	0	0	0	2	2	2	5	4	4	4	2	5	1	1	3	3	5	5	6	4	6
2021-10-14 10:34:17	398	1	39	1	3	13	0	0	0	1	0	2	-2	-2	3	-2	-2	-2	-2	3	-2	1	0	0	0	0	0	0	0	0	0	2	1	4	6	6	6	6	4	4	6	6	6	6	6	6	6	6	6
2021-10-14 10:34:43	177	2	43	1	4	14	0	0	1	0	0	2	-2	1	-2	-2	-2	1	-2	-2	-2	1	0	0	0	0	0	0	0	1	0	1	2	6	6	6	6	6	6	6	1	1	1	1	1	1	1	1	1
2021-10-14 10:39:26	668	1	58	1	4	36	0	0	0	0	1	1	1	-2	1	-2	-2	1	-2	-2	1	1	1	0	0	0	0	0	0	0	0	1	1	3	1	1	1	1	1	1	6	5	6	6	6	6	6	5	5
2021-10-14 10:43:18	227	2	41	1	4	17	0	0	1	0	0	1	1	-2	-2	-2	-2	-2	-2	-2	-2	0	1	0	1	0	0	0	0	0	0	1	1	6	4	6	6	4	6	6	1	1	1	1	6	6	3	6	6
2021-10-14 10:52:27	270	1	40	1	4	18	0	0	1	0	0	1	1	1	1	1	-2	-2	-2	-2	-2	0	0	0	0	0	0	0	0	1	0	2	1	2	5	5	5	3	4	6	5	5	5	5	5	5	5	5	5
2021-10-14 11:03:35	430	2	42	1	3	12	0	0	1	0	0	2	1	-2	-2	-2	-2	-2	-2	-2	-2	1	0	0	1	0	1	0	0	0	0	1	1	6	4	4	5	6	5	6	3	3	4	4	4	4	4	5	4
2021-10-14 11:07:00	334	1	37	1	2	13	0	0	0	1	0	2	4	-2	4	-2	-2	-2	-2	-2	-2	1	1	0	0	0	0	0	0	0	0	1	1	4	4	6	5	4	6	4	6	4	6	4	4	4	4	4	4
2021-10-14 11:12:10	762	1	53	1	2	29	0	0	0	0	1	1	1	-2	-2	-2	-2	-2	-2	-2	-2	1	0	0	0	0	0	0	0	1	0	1	2	2	2	6	6	6	3	2	6	6	6	3	4	6	3	3	4
2021-10-14 11:14:32	267	2	28	1	2	0.5	0	0	1	0	0	3	1	-2	-2	-2	-2	-2	-2	-2	-2	1	0	0	0	0	0	0	0	0	0	2	1	1	5	6	6	6	5	5	5	5	6	6	5	5	5	5	5
2021-10-14 11:15:21	1303	2	56	1	4	36	0	0	1	0	0	1	-2	-2	1	-2	-2	-2	-2	-2	-2	0	1	0	0	0	0	0	0	0	0	1	1	6	5	5	5	5	5	5	5	5	5	5	5	5	5	5	5
2021-10-14 11:16:32	654	1	55	1	4	33	0	0	0	1	0	1	1	-2	-2	-2	-2	-2	-2	-2	-2	1	0	0	0	0	0	0	0	0	0	1	1	6	5	6	6	6	4	5	6	6	6	6	6	6	5	5	5
2021-10-14 11:17:16	406	2	38	1	3	16	0	0	1	0	0	2	-2	-2	1	-2	-2	-2	-2	1	-2	0	1	1	0	0	0	0	0	0	0	1	1	4	6	6	6	6	6	6	6	6	6	6	5	6	6	6	6
2021-10-14 11:22:43	537	2	55	1	4	30	0	0	0	1	0	1	-2	-2	1	-2	-2	-2	-2	1	-2	0	1	1	0	0	0	0	0	0	0	1	2	5	5	6	6	6	6	6	5	5	5	5	5	5	5	5	6
2021-10-14 11:30:24	616	2	43	1	3	20	0	0	1	0	0	2	-2	-2	1	-2	-2	-2	-2	1	-2	0	0	1	0	0	0	0	0	0	0	1	1	4	4	4	4	4	4	4	4	4	4	4	4	4	4	4	4
2021-10-14 11:39:17	364	1	40	1	2	13	0	0	0	1	0	2	1	-2	1	-2	-2	-2	-2	-2	-2	1	0	0	0	0	0	0	0	0	0	2	1	3	6	2	3	5	3	4	3	2	6	5	6	6	3	3	2
2021-10-14 11:44:34	513	2	44	1	3	16	1	0	0	0	0	2	-2	-2	1	-2	-2	-2	-2	1	-2	0	1	1	0	0	0	0	0	0	0	1	1	4	4	6	5	6	5	5	5	4	4	4	4	5	4	5	5
2021-10-14 11:46:13	388	1	40	1	3	21	0	0	1	0	0	1	1	-2	-2	-2	-2	-2	-2	-2	-2	1	1	0	0	0	0	0	0	1	0	1	1	6	6	6	6	6	6	6	6	6	6	6	6	6	6	6	6
2021-10-14 11:46:21	394	2	38	1	3	1	0	0	1	0	0	4	1	-2	-2	-2	-2	-2	-2	-2	-2	1	0	0	0	0	0	0	0	0	0	2	1	3	1	1	5	1	1	1	6	6	6	6	6	6	3	3	6
2021-10-14 11:53:30	421	2	50	1	5	26	1	1	0	0	0	1	-2	-2	1	-2	1	-2	-2	1	-2	0	1	1	0	0	0	0	0	0	0	1	1	5	5	6	6	6	5	6	5	5	5	5	5	5	5	3	4
2021-10-14 11:57:44	543	2	29	1	2	1	0	0	1	0	0	4	1	-2	-2	-2	-2	-2	-2	-2	-2	0	0	0	0	0	0	0	0	1	0	1	1	4	6	6	4	5	4	5	5	5	5	5	6	6	5	6	5
2021-10-14 11:59:13	324	1	44	1	3	17	0	0	1	0	0	1	1	-2	-2	-2	-2	-2	-2	-2	-2	1	0	0	0	0	0	0	0	0	0	1	1	4	2	4	2	3	3	3	2	2	2	2	2	2	2	2	2
2021-10-14 12:03:22	443	2	48	1	4	26	0	0	1	0	0	4	3	-2	1	-2	-2	-2	-2	-2	-2	0	1	0	0	0	0	0	0	0	0	1	2	2	3	3	4	4	5	2	4	4	4	4	4	4	4	5	4
2021-10-14 12:08:43	552	2	38	3	3	11	0	0	0	1	0	2	1	-2	-2	-2	-2	-2	-2	-2	1	1	0	0	0	0	0	0	0	0	0	1	1	6	6	6	6	6	6	6	6	6	6	6	6	6	6	6	6
2021-10-14 12:16:26	695	1	56	1	4	35	0	0	0	1	0	1	1	-2	1	-2	-2	-2	-2	-2	-2	1	0	0	0	0	0	0	0	1	0	1	1	5	6	6	6	6	6	6	5	5	6	6	4	6	3	6	5
2021-10-14 12:21:00	206	1	42	1	4	15	1	0	0	0	0	2	-2	-2	1	-2	-2	-2	-2	1	-2	0	1	1	0	0	0	0	0	0	0	1	1	4	6	6	6	4	4	6	6	6	6	6	6	6	6	6	6
2021-10-14 12:21:44	349	1	46	1	3	22	0	0	0	1	0	1	3	-2	-2	-2	-2	-2	-2	-2	-2	1	1	1	0	0	0	0	0	0	0	1	1	4	4	6	6	6	6	6	6	6	6	6	6	6	6	6	6
2021-10-14 12:26:47	600	1	32	1	3	4	0	0	1	0	0	4	1	-2	-2	-2	-2	-2	-2	-2	-2	1	1	0	0	0	0	0	0	0	0	1	1	4	4	6	6	6	4	2	4	4	6	6	5	5	4	4	4
2021-10-14 12:30:39	754	2	45	1	4	16	0	0	1	0	0	2	1	-2	-2	-2	1	-2	-2	-2	-2	1	0	0	1	0	0	0	0	0	0	1	1	4	5	5	5	5	3	3	4	4	5	5	5	5	5	5	5
2021-10-14 12:36:32	459	1	49	1	2	33	0	0	0	1	0	1	1	-2	-2	-2	-2	-2	-2	-2	-2	1	0	0	0	0	0	0	0	0	0	3	1	5	6	6	6	6	6	6	4	4	6	6	4	4	4	5	6
2021-10-14 12:40:00	337	1	37	1	2	12	0	0	0	1	0	2	1	-2	-2	-2	-2	-2	-2	-2	-2	0	0	0	0	0	0	0	0	1	0	3	1	5	5	5	5	5	5	5	5	5	5	5	5	5	5	5	5
2021-10-14 12:40:49	385	1	48	1	4	22	0	0	1	0	0	1	1	1	-2	-2	-2	-2	-2	-2	-2	1	0	0	1	0	1	0	0	1	0	2	2	3	5	5	5	6	6	4	5	5	6	6	6	6	6	6	6
2021-10-14 12:59:48	496	1	43	1	3	18	0	0	1	0	0	1	1	1	-2	-2	-2	-2	-2	-2	-2	1	0	0	1	0	0	0	0	0	0	1	1	6	2	6	5	5	4	4	5	5	6	4	5	5	5	4	3
2021-10-14 13:00:30	877	2	50	1	3	24	0	0	0	1	0	1	1	1	1	1	-2	-2	-2	1	1	1	1	1	0	0	0	0	0	0	0	1	2	4	1	6	2	3	3	4	4	4	6	5	5	3	4	4	4
2021-10-14 13:18:04	299	1	55	1	5	6	0	0	0	1	0	1	1	-2	-2	-2	-2	-2	-2	-2	-2	0	0	0	1	0	0	0	0	1	0	1	2	4	3	2	4	4	4	2	3	3	2	3	3	3	2	2	3
2021-10-14 13:23:00	676	2	44	1	4	20	0	0	1	0	0	1	1	1	-2	-2	-2	-2	-2	-2	-2	1	0	0	0	0	0	0	0	0	0	1	1	6	5	6	4	4	4	5	5	5	5	5	6	5	3	5	5
2021-10-14 13:33:39	473	2	40	1	4	16	0	0	1	0	0	2	-2	-2	1	-2	-2	-2	-2	-2	-2	0	1	1	0	0	0	0	0	0	0	1	1	2	5	6	5	6	4	5	3	2	5	5	4	6	6	6	6
2021-10-14 13:46:03	454	2	30	1	2	3	0	0	1	0	0	4	-2	-2	1	-2	-2	-2	-2	-2	-2	0	1	0	0	0	0	0	0	0	0	1	1	3	4	6	4	5	4	4	6	5	6	5	5	5	4	3	4
2021-10-14 13:55:38	415	2	30	1	3	2	1	0	0	0	0	4	-2	-2	-2	-2	-2	-2	-2	-2	1	0	1	0	0	0	0	0	0	0	0	1	1	6	6	6	6	6	6	6	6	6	6	6	6	6	6	6	6
2021-10-14 14:01:53	1030	1	52	1	5	31	0	0	1	0	0	1	1	1	-2	-2	-2	-2	-2	-2	-2	1	0	0	1	0	0	0	0	1	0	1	1	6	5	6	6	6	5	5	5	5	6	6	5	5	5	5	5
2021-10-14 14:05:23	291	2	49	1	5	23	1	0	0	0	0	1	-2	-2	-2	-2	-2	-2	-2	-2	3	0	0	0	0	0	0	0	0	0	1	1	1	5	6	6	5	5	6	5	4	5	6	6	5	5	6	6	5
2021-10-14 14:09:52	698	2	48	1	4	26	1	0	0	0	0	1	1	1	-2	-2	1	-2	-2	-2	-2	1	0	0	0	0	0	0	0	0	0	2	1	3	3	6	5	6	3	4	5	5	5	4	5	5	4	4	4
2021-10-14 14:43:53	786	1	38	1	3	15	0	0	0	1	0	2	1	1	1	-2	-2	-2	-2	1	-2	1	1	1	1	0	0	0	0	0	0	1	1	4	5	4	5	5	5	4	4	4	5	4	5	5	5	4	5
2021-10-14 14:49:33	985	1	50	1	4	25	0	1	1	0	0	1	-2	-2	3	-2	-2	-2	-2	3	-2	0	1	1	0	0	0	0	0	0	0	2	2	3	4	5	4	4	5	4	5	5	5	5	4	4	4	4	4
2021-10-14 17:06:50	325	1	40	1	3	13	0	0	1	0	0	2	1	-2	1	-2	-2	-2	-2	1	-2	1	1	1	1	0	0	0	0	0	0	1	1	4	1	3	5	2	2	2	4	4	4	4	4	4	4	4	4
2021-10-14 17:55:55	1025	2	38	2	6	13	0	0	0	1	0	3	1	-2	-2	-2	-2	-2	-2	-2	-2	1	0	0	1	0	0	0	0	0	0	1	1	5	6	6	6	6	6	6	6	6	6	6	6	6	6	6	6
2021-10-14 22:58:13	319	1	40	1	3	20	1	0	0	0	0	1	1	-2	-2	-2	-2	-2	-2	-2	-2	0	0	0	0	0	0	0	0	1	0	1	1	2	5	5	4	5	5	5	5	5	5	5	5	5	5	5	5
[truncated: 59 more columns]
